# Supplementary material for: Dietitians’ Perspectives on Interventions to Enhance Adherence to Dietary Advice for Chronic Diseases in Adults
Source: Atypon-hosted journal article supplement (doi:10.3148/cjdpr-2015-009), 2015-05-21
Supplement: cjdpr-2015-009suppl.pdf [file cjdpr-2015-009suppl.pdf]

**Supplementary Table****Example of a question from the questionnaire**Feedback based on self-monitoring

*This involves providing the patient with data about his/her own recorded behaviour(s) and teaching them to self-evaluate their behaviour(s); e.g., in a diary*

How important is feedback based on self-monitoring for enhancing adherence to dietary advice in Canada?

| 1                | 2           | 3                    | 4                                 | 5                  | 6         | 7              |
|------------------|-------------|----------------------|-----------------------------------|--------------------|-----------|----------------|
| Very unimportant | Unimportant | Slightly unimportant | Neither important nor unimportant | Slightly important | Important | Very important |
| Unimportant      |             | Neutral              |                                   |                    | Important |                |

Comments: \_\_\_\_\_

According to your experience, what is the applicability of feedback based on self-monitoring in the Canadian context?

| 1                    | 2            | 3                        | 4                                            | 5                      | 6          | 7                  |
|----------------------|--------------|--------------------------|----------------------------------------------|------------------------|------------|--------------------|
| Very<br>inapplicable | Inapplicable | Slightly<br>inapplicable | Neither<br>applicable<br>nor<br>inapplicable | Slightly<br>applicable | Applicable | Very<br>applicable |
| Inapplicable         |              | Neutral                  |                                              |                        | Applicable |                    |

Comments: \_\_\_\_\_
